# Supplementary material for: Oxicam-type non-steroidal anti-inflammatory drugs inhibit NPR1-mediated salicylic acid pathway
Source: PubMed Central journal article supplement (PMC8674334; doi:10.1038/s41467-021-27489-w), 2021-12-15
Supplement: 41467_2021_27489_MOESM3_ESM.pdf [file 41467_2021_27489_MOESM3_ESM.pdf]

### Description of Additional Supplementary Files

**File name: Supplementary Data 1**

Description: Normalized expression values of genes in Col-0 WT and npr1-1 treated with SA and/or TNX.

**File name: Supplementary Data 2**

Description: List of 2,402 genes which were upregulated in Col-0 WT in response to 100  $\mu$ M TNX treatment for 24 hr (FDR = 0.001 and  $\log_2FC > 1$ ).

**File name: Supplementary Data 3**

Description: List of 2,662 genes which were repressed in Col-0 WT in response to 100  $\mu$ M TNX treatment for 24 hr (FDR = 0.001 and  $\log_2FC < -1$ ).

**File name: Supplementary Data 4**

Description: List of 940 genes which were upregulated in Col-0 WT in response to 100  $\mu$ M SA treatment for 24 hr (FDR = 0.001 and  $\log_2FC > 1$ ).

**File name: Supplementary Data 5**

Description: List of 631 genes which were repressed in npr1-1 compared with Col-0 WT in response to 100  $\mu$ M SA treatment for 24 hr ( $\log_2FC$  (SA/mock in WT) –  $\log_2FC$  (SA/mock in npr1)  $> 1$ ).

**File name: Supplementary Data 6**

Description: List of 383 genes which were repressed in Col-0 WT co-treated with 100  $\mu$ M SA + 100  $\mu$ M TNX compared with Col-0 WT treated with 100  $\mu$ M SA for 24 hr ( $\log_2FC$  (SA/SA+TNX)  $> 1$ ).

**File name: Supplementary Data 7**

Description: Expression levels of the SA-inducible NPR1-dependent genes and group information in Figure 3d.

**File name: Supplementary Data 8**

Description: List of 207 genes which were repressed in npr1-1 co-treated with 100  $\mu$ M SA + 100  $\mu$ M TNX compared with npr1-1 treated with 100  $\mu$ M SA for 24 hr ( $\log_2FC$  (SA/SA+TNX) in npr1  $> 1$ ).

**File name: Supplementary Data 9**

Description: List of 256 genes which were repressed in Col-0 WT in response to 100  $\mu$ M SA treatment for 24 hr (FDR = 0.001 and  $\log_2FC < -1$ ).

**File name: Supplementary Data 10**

Description: List of 142 genes which were repressed in Col-0 WT in response to 100  $\mu$ M SA treatment for 24 hr but were restored in npr1-1 ( $\log_2FC$  (SA/mock in WT) -  $\log_2FC$  (SA/mock in npr1)  $< -1$ ).

**File name: Supplementary Data 11**

Description: List of 43 genes which were repressed in Col-0 WT in response to 100  $\mu$ M SA treatment for 24 hr but were restored by co-treatment with TNX ( $\log_2FC$  (SA/SA+TNX in WT)  $< -1$ ).
